# Supplementary material
Source: PubMed Central journal article supplement (PMC5237122)
Supplement: JB.00608-16_zjb999094311s1.pdf [file JB.00608-16_zjb999094311s1.pdf]

## Supplemental material

### Roles of the essential protein FtsA in cell growth and division in *Streptococcus pneumoniae*

**Table S1.** Strains, plasmids and constructs

**Table S2.** List of primers

**References** Table S1 and Table S2

**Fig. S1.** Construction of *S. pneumoniae* *ftsA* conditional null strains

**Fig. S2.** Construction of D39 FLAG-*ftsA-ftsZ*-Myc  $\Delta$ *sepF* markerless strain

**Fig. S3.** Characteristics of D39  $\Delta$ *cps* FLAG-*ftsA ftsZ*-Myc strain

**Fig. S4.** Localization of FtsZ and PG synthesis in cells lacking SepF and GpsB

**Fig. S5.** Overexpression of FtsA in *S. pneumoniae* D39  $\Delta$ *sepF* mutants

**Table S1. Strains, plasmids and constructs used in this study**

| Strain <sup>a</sup>                                                                                        | Relevant genotype <sup>b,c</sup>                                                                                                                                                                                                                                                                                                                            | Reference                      |
|------------------------------------------------------------------------------------------------------------|-------------------------------------------------------------------------------------------------------------------------------------------------------------------------------------------------------------------------------------------------------------------------------------------------------------------------------------------------------------|--------------------------------|
| <b><i>S. pneumoniae</i></b>                                                                                |                                                                                                                                                                                                                                                                                                                                                             |                                |
| Rx1                                                                                                        | unencapsulated wild-type                                                                                                                                                                                                                                                                                                                                    | Ravin <i>et al.</i> , 1959     |
| Rx1<br><i>ftsA</i> <sup>+</sup> // <i>P</i> <sub>Zn</sub> <i>gfp-ftsA</i> <sup>+</sup>                     | <i>tet, bgaA</i> <sup>+</sup> :: <i>P</i> <sub>czcD</sub> - <i>gfp-ftsA</i><br>(Rx1 transformed with PvuI cut pJWV25- <i>gfp-ftsA</i> <sup>+</sup> )                                                                                                                                                                                                        | This study                     |
| Rx1<br>$\Delta$ <i>ftsA</i> // <i>P</i> <sub>Zn</sub> <i>gfp-ftsA</i> <sup>+</sup>                         | <i>tet, bgaA</i> <sup>+</sup> :: <i>P</i> <sub>czcD</sub> - <i>gfp-ftsA</i> , <i>cm, \Delta ftsA</i> :: <i>P</i> <sub>less</sub> - <i>cat</i><br>(Rx1 <i>P</i> <sub>Zn</sub> <i>gfp-ftsA</i> <sup>+</sup> transformed with $\Delta$ <i>ftsA</i> :: <i>P</i> <sub>less</sub> - <i>cat</i> )                                                                  | This study                     |
| Rx1 <i>ftsZ-mCherry</i>                                                                                    | <i>ftsZ</i> :: <i>ftsZ-mCherry-P</i> <sub>c</sub> - <i>erm</i><br>(Rx1 transformed with <i>ftsZ-mCherry-P</i> <sub>c</sub> - <i>erm</i> )                                                                                                                                                                                                                   | This study                     |
| Rx1<br><i>ftsA</i> <sup>+</sup> // <i>P</i> <sub>Zn</sub> <i>gfp-ftsA</i> <sup>+</sup> <i>ftsZ-mCherry</i> | <i>tet, bgaA</i> <sup>+</sup> :: <i>P</i> <sub>czcD</sub> - <i>gfp-ftsA</i> , <i>ftsZ</i> :: <i>ftsZ-mCherry-P</i> <sub>c</sub> - <i>erm</i><br>(Rx1 <i>P</i> <sub>Zn</sub> <i>gfp-ftsA</i> <sup>+</sup> transformed with <i>ftsZ-mCherry-P</i> <sub>c</sub> - <i>erm</i> )                                                                                 | This study                     |
| Rx1<br><i>ftsA</i> // <i>P</i> <sub>Zn</sub> <i>gfp-ftsA</i> <sup>+</sup> <i>ftsZ-mCherry</i>              | <i>tet, bgaA</i> <sup>+</sup> :: <i>P</i> <sub>czcD</sub> - <i>gfp-ftsA</i> , <i>cm, \Delta ftsA</i> :: <i>P</i> <sub>less</sub> <i>cat, ftsZ</i> :: <i>ftsZ-mCherry-P</i> <sub>c</sub> - <i>erm</i><br>(Rx1 $\Delta$ <i>ftsA</i> // <i>P</i> <sub>Zn</sub> <i>gfp-ftsA</i> <sup>+</sup> transformed with <i>ftsZ-mCherry-P</i> <sub>c</sub> - <i>erm</i> ) | This study                     |
| Rx1 $\Delta$ <i>sepF</i>                                                                                   | <i>cm, \Delta ylmF</i> :: <i>cat</i><br>(Rx1 transformed with $\Delta$ <i>ylmF</i> :: <i>cat</i> )                                                                                                                                                                                                                                                          | Fadda <i>et al.</i> , 2003     |
| Rx1 $\Delta$ <i>sepF ftsZ-mCherry</i>                                                                      | <i>cm, \Delta sepF</i> :: <i>cat, ftsZ</i> :: <i>ftsZ-mCherry-P</i> <sub>c</sub> - <i>erm</i><br>(Rx1 $\Delta$ <i>sepF</i> transformed with <i>ftsZ-mCherry-P</i> <sub>c</sub> - <i>erm</i> )                                                                                                                                                               | This study                     |
| Rx1<br>$\Delta$ <i>sepF</i> // <i>P</i> <sub>Zn</sub> <i>gfp-ftsA</i> <sup>+</sup>                         | <i>cm, \Delta sepF</i> :: <i>cat; tet, bgaA</i> <sup>+</sup> :: <i>P</i> <sub>czcD</sub> - <i>gfp-ftsA</i> <sup>+</sup><br>(Rx1 $\Delta$ <i>sepF</i> transformed with PvuI cut pJWV25- <i>gfp-ftsA</i> <sup>+</sup> )                                                                                                                                       | This study                     |
| Rx1<br>$\Delta$ <i>sepF</i> // <i>P</i> <sub>Zn</sub> <i>gfp-sepF</i> <sup>+</sup>                         | <i>cm, \Delta sepF</i> :: <i>cat; tet, bgaA</i> <sup>+</sup> :: <i>P</i> <sub>czcD</sub> - <i>gfp-sepF</i> <sup>+</sup><br>(Rx1 $\Delta$ <i>sepF</i> transformed with PvuI cut pJWV25- <i>gfp-sepF</i> <sup>+</sup> )                                                                                                                                       | This study                     |
| Rx1 $\Delta$ <i>gpsB sup4</i>                                                                              | <i>cm, \Delta gpsB</i> :: <i>cat; sup4</i><br>(Rx1 transformed with <i>gpsB</i> :: <i>cat</i> )                                                                                                                                                                                                                                                             | Rued <i>et al.</i> , submitted |
| Rx1 $\Delta$ <i>gpsB sup4 ftsZ-mCherry</i>                                                                 | <i>cm, \Delta gpsB</i> :: <i>cat; sup4; ftsZ</i> :: <i>ftsZ-mCherry-P</i> <sub>c</sub> - <i>erm</i><br>(Rx1 $\Delta$ <i>gpsB</i> transformed with <i>ftsZ-mCherry-P</i> <sub>c</sub> - <i>erm</i> )                                                                                                                                                         | Rued <i>et al.</i> , submitted |
| Rx1 $\Delta$ <i>gpsB sup4</i> // <i>P</i> <sub>Zn</sub> <i>gfp-ftsA</i> <sup>+</sup>                       | <i>cm, \Delta gpsB</i> :: <i>cat; sup4; tet, bgaA</i> <sup>+</sup> :: <i>P</i> <sub>czcD</sub> - <i>gfp-ftsA</i><br>(Rx1 $\Delta$ <i>gpsB</i> transformed with PvuI cut pJWV25- <i>gfp-ftsA</i> <sup>+</sup> )                                                                                                                                              | This study                     |
| Rx1 $\Delta$ <i>gpsB sup4</i> // <i>P</i> <sub>Zn</sub> <i>gfp-gpsB</i> <sup>+</sup>                       | <i>cm, \Delta gpsB</i> :: <i>cat; sup4; tet, bgaA</i> <sup>+</sup> :: <i>P</i> <sub>czcD</sub> - <i>gfp-gpsB</i><br>(Rx1 $\Delta$ <i>gpsB</i> transformed with PvuI cut pJWV25- <i>gfp-gpsB</i> <sup>+</sup> )                                                                                                                                              | This study                     |
| Rx1<br><i>sepF</i> <sup>+</sup> // <i>P</i> <sub>Zn</sub> <i>gfp-sepF</i> <sup>+</sup>                     | <i>tet, bgaA</i> <sup>+</sup> :: <i>P</i> <sub>czcD</sub> - <i>gfp-sepF</i> <sup>+</sup><br>(Rx1 transformed with PvuI cut pJWV25- <i>gfp-sepF</i> <sup>+</sup> )                                                                                                                                                                                           | This study                     |
| Rx1<br><i>sepF</i> <sup>+</sup> // <i>P</i> <sub>Zn</sub> <i>gfp-sepF</i> <sup>+</sup> <i>ftsZ-mCherry</i> | <i>tet, bgaA</i> <sup>+</sup> :: <i>P</i> <sub>czcD</sub> - <i>gfp-sepF</i> , <i>ftsZ</i> :: <i>ftsZ-mCherry-P</i> <sub>c</sub> - <i>erm</i><br>(Rx1 <i>P</i> <sub>Zn</sub> <i>gfp-sepF</i> <sup>+</sup> transformed with <i>ftsZ-mCherry-P</i> <sub>c</sub> - <i>erm</i> )                                                                                 | This study                     |

|                                                                                                               |                                                                                                                                                                                                                                                                                                        |                            |
|---------------------------------------------------------------------------------------------------------------|--------------------------------------------------------------------------------------------------------------------------------------------------------------------------------------------------------------------------------------------------------------------------------------------------------|----------------------------|
| Rx1<br><i>gpsB</i> <sup>+</sup> // <i>P</i> <sub>Zn</sub> <i>gfp-gpsB</i> <sup>+</sup>                        | <i>tet, bgaA</i> <sup>+</sup> :: <i>P</i> <sub>czcD</sub> - <i>gfp-gpsB</i><br>(Rx1 transformed with PvuI cut pJWV25- <i>gfp-gpsB</i> <sup>+</sup> )                                                                                                                                                   | This study                 |
| Rx1<br><i>gpsB</i> <sup>+</sup> // <i>P</i> <sub>Zn</sub> <i>gfp-gpsB</i> <sup>+</sup><br><i>ftsZ-mCherry</i> | <i>tet, bgaA</i> <sup>+</sup> :: <i>P</i> <sub>czcD</sub> - <i>gfp-gpsB, ftsZ::ftsZ-mCherry-P</i> <sub>c</sub> - <i>erm</i><br>(Rx1 <i>P</i> <sub>Zn</sub> <i>gfp-gpsB</i> <sup>+</sup> transformed with <i>ftsZ-mCherry-P</i> <sub>c</sub> - <i>erm</i> )                                             | This study                 |
| IU1824                                                                                                        | D39 $\Delta$ <i>cps, str, rpsL1</i>                                                                                                                                                                                                                                                                    | Lanie <i>et al.</i> , 2007 |
| IU1945                                                                                                        | D39 $\Delta$ <i>cps</i>                                                                                                                                                                                                                                                                                | Lanie <i>et al.</i> , 2007 |
| IU6962                                                                                                        | D39 $\Delta$ <i>cps, kan, ftsZ-Myc-P</i> <sub>c</sub> - <i>kan</i>                                                                                                                                                                                                                                     | Land <i>et al.</i> , 2013  |
| IU7612                                                                                                        | D39 $\Delta$ <i>cps, rpsL1, kan, \Delta sepF::P</i> <sub>c</sub> -[ <i>kan-rpsL</i> <sup>+</sup> ]<br>(IU1824 transformed with amplicon $\Delta$ <i>sepF::P</i> <sub>c</sub> -[ <i>kan-rpsL</i> <sup>+</sup> ] from K734)                                                                              | This study                 |
| IU7614                                                                                                        | D39 $\Delta$ <i>cps, rpsL1, kan, ftsZ</i> <sup>+</sup> - <i>P</i> <sub>c</sub> -[ <i>kan-rpsL</i> <sup>+</sup> ]                                                                                                                                                                                       | Tsui <i>et al.</i> , 2016  |
| IU7667                                                                                                        | D39 $\Delta$ <i>cps, str, rpsL1, ftsZ-Myc</i><br>(IU7614 transformed with fusion amplicon <i>ftsZ-Myc</i> )                                                                                                                                                                                            | This study                 |
| IU8039                                                                                                        | D39 $\Delta$ <i>cps, str, rpsL1, \Delta sepF</i> markerless<br>(IU7612 transformed with fusion amplicon $\Delta$ <i>sepF</i> markerless)                                                                                                                                                               | This study                 |
| IU8499                                                                                                        | D39 $\Delta$ <i>cps, rpsL1, kan, ftsZ-Myc-ylmE</i> <sup>+</sup> - $\Delta$ <i>sepF::P</i> <sub>c</sub> -[ <i>kan-rpsL</i> <sup>+</sup> ]<br>(IU1824 was transformed with fusion amplicon <i>ftsZ-Myc-ylmE</i> <sup>+</sup> - $\Delta$ <i>sepF::P</i> <sub>c</sub> -[ <i>kan-rpsL</i> <sup>+</sup> ])   | This study                 |
| IU8503                                                                                                        | D39 $\Delta$ <i>cps, str, rpsL1, ftsZ-Myc-ylmE</i> <sup>+</sup> - $\Delta$ <i>sepF</i> markerless<br>(IU7612 transformed with fusion amplicon <i>ftsZ-Myc</i> $\Delta$ <i>sepF</i> markerless)                                                                                                         | This study                 |
| IU9767                                                                                                        | D39 $\Delta$ <i>cps, rpsL1, kan, P</i> <sub>c</sub> -[ <i>kan-rpsL</i> <sup>+</sup> ]- <i>ftsA</i> <sup>+</sup><br>(IU1824 transformed with <i>P</i> <sub>c</sub> -[ <i>kan-rpsL</i> <sup>+</sup> ]- <i>ftsA</i> <sup>+</sup> fusion amplicon)                                                         | This study                 |
| IU9969                                                                                                        | D39 $\Delta$ <i>cps, str, rpsL1, FLAG-ftsA</i><br>(IU9767 transformed with <i>FLAG-ftsA</i> fusion amplicon)                                                                                                                                                                                           | This study                 |
| IU10236                                                                                                       | D39 $\Delta$ <i>cps, rpsL1, kan, FLAG-ftsA-ftsZ-P</i> <sub>c</sub> -[ <i>kan-rpsL</i> <sup>+</sup> ]<br>(IU9969 transformed with <i>ftsZ-P</i> <sub>c</sub> -[ <i>kan-rpsL</i> <sup>+</sup> ] amplicon from IU7614)                                                                                    | This study                 |
| IU10304                                                                                                       | D39 $\Delta$ <i>cps, str, rpsL1, FLAG-ftsA ftsZ-Myc</i><br>(IU10236 was transformed with <i>ftsZ-Myc</i> amplicon from IU7667)                                                                                                                                                                         | This study                 |
| IU10576                                                                                                       | D39 $\Delta$ <i>cps, rpsL1, kan, FLAG-ftsA ftsZ-Myc \Delta sepF::P</i> <sub>c</sub> -[ <i>kan-rpsL</i> <sup>+</sup> ]<br>(IU10304 transformed with <i>ftsZ-Myc-ylmE</i> <sup>+</sup> - $\Delta$ <i>sepF::P</i> <sub>c</sub> -[ <i>kan-rpsL</i> <sup>+</sup> ] amplicon from IU8499)                    | This study                 |
| IU10632                                                                                                       | <i>str, rpsL1, FLAG-ftsA ftsZ-Myc-ylmE</i> <sup>+</sup> - $\Delta$ <i>sepF</i><br>(IU10576 transformed with <i>ftsZ-Myc-ylmE</i> <sup>+</sup> - $\Delta$ <i>sepF</i> amplicon from IU8499)                                                                                                             | This study                 |
| IU12307                                                                                                       | D39 $\Delta$ <i>cps, tet, bgaA</i> <sup>+</sup> :: <i>tet-P</i> <sub>Zn</sub> -RBS <sub><i>ftsA</i></sub> - <i>ftsA</i> <sup>+</sup><br>(IU1945 transformed with fusion <i>bgaA</i> <sup>+</sup> :: <i>tet-P</i> <sub>Zn</sub> -RBS <sub><i>ftsA</i></sub> - <i>ftsA</i> <sup>+</sup> fusion amplicon) | This study                 |

|                                                  |                                                                                                                                                                                                                                                                                                                                |                                |
|--------------------------------------------------|--------------------------------------------------------------------------------------------------------------------------------------------------------------------------------------------------------------------------------------------------------------------------------------------------------------------------------|--------------------------------|
| IU12310                                          | D39 $\Delta cps$ , <i>str</i> , <i>rpsL1</i> , <i>tet</i> , <i>bgaA'</i> :: <i>tet</i> -P <sub>Zn</sub> -RBS <sub><i>ftsA</i></sub> - <i>ftsA</i> <sup>+</sup><br>(IU1824 transformed with <i>bgaA'</i> :: <i>tet</i> -P <sub>Zn</sub> -RBS <sub><i>ftsA</i></sub> - <i>ftsA</i> <sup>+</sup> fusion amplicon)                 | This study                     |
| IU12323                                          | D39 $\Delta cps$ , <i>spec</i> , $\Delta ftsA$ :: <i>aad9</i> , <i>tet</i> , <i>bgaA'</i> :: <i>tet</i> -P <sub>Zn</sub> -RBS <sub><i>ftsA</i></sub> - <i>ftsA</i> <sup>+</sup><br>(IU12307 transformed with $\Delta ftsA$ :: <i>aad9</i> fusion amplicon)                                                                     | This study                     |
| IU12326                                          | D39 $\Delta cps$ , <i>str</i> , <i>rpsL1</i> , $\Delta sepF$ , <i>tet</i> , <i>bgaA'</i> :: <i>tet</i> -P <sub>Zn</sub> -RBS <sub><i>ftsA</i></sub> - <i>ftsA</i> <sup>+</sup><br>(IU8039 transformed with <i>bgaA'</i> :: <i>tet</i> -P <sub>Zn</sub> -RBS <sub><i>ftsA</i></sub> - <i>ftsA</i> <sup>+</sup> fusion amplicon) | This study                     |
| K734                                             | D39 $\Delta cps$ , <i>kan</i> , $\Delta sepF$ ( <i>spd_1477</i> )::P <sub>c</sub> -[ <i>kan-rpsL</i> <sup>+</sup> ]<br>(IU1945 transformed with $\Delta sepF$ ::P <sub>c</sub> -[ <i>kan-rpsL</i> <sup>+</sup> ] fusion amplicon)                                                                                              | This study                     |
| <b>Escherichia coli</b>                          |                                                                                                                                                                                                                                                                                                                                |                                |
| DH5 $\alpha$                                     | F <sup>-</sup> , 80 <i>dlacZ</i> M15 ( <i>lacZYA-argF</i> ) U169 <i>recA1</i> <i>endA1</i> <i>hsdR17</i> ( <i>rk</i> <sup>-</sup> , <i>mk</i> <sup>+</sup> ) <i>phoA</i> <i>supE44</i> - <i>thi-1</i> <i>gyrA96</i> <i>relA1</i>                                                                                               | Hanahan, 1983                  |
| <b>Plasmid</b>                                   |                                                                                                                                                                                                                                                                                                                                |                                |
| pR326                                            | <i>cm</i> , source of <i>cat</i> cassette                                                                                                                                                                                                                                                                                      | Fadda <i>et al.</i> , 2003     |
| <i>pply</i> :: <i>cat</i>                        | <i>cm</i> , <i>ply</i> :: <i>cat</i>                                                                                                                                                                                                                                                                                           | Fadda <i>et al.</i> , 2003     |
| pJWV25                                           | <i>amp</i> , <i>tetM</i> , <i>bgaA</i> , - <i>gfp</i> <sup>+</sup>                                                                                                                                                                                                                                                             | Eberhardt <i>et al.</i> , 2009 |
| pJWV25- <i>gfp-ftsA</i> <sup>+</sup>             | <i>amp</i> , <i>tetM</i> , <i>bgaA</i> , - <i>gfp-ftsA</i> <sup>+</sup>                                                                                                                                                                                                                                                        | Beilharz <i>et al.</i> , 2012  |
| pJWV25- <i>gfp-sepF</i> <sup>+</sup>             | <i>amp</i> , <i>tetM</i> , <i>bgaA</i> , - <i>gfp-sepF</i> <sup>+</sup>                                                                                                                                                                                                                                                        | This study                     |
| pJWV25- <i>gfp-gpsB</i> <sup>+</sup>             | <i>amp</i> , <i>tetM</i> , <i>bgaA</i> , - <i>gfp-gpsB</i> <sup>+</sup>                                                                                                                                                                                                                                                        | This study                     |
| <b>Construct</b>                                 |                                                                                                                                                                                                                                                                                                                                |                                |
| <i>ftsZ-mCherry</i> -P <sub>c</sub> - <i>erm</i> | <i>erm</i>                                                                                                                                                                                                                                                                                                                     | Sham <i>et al.</i> , 2011      |
| P <sub>c</sub> -[ <i>kan-rpsL</i> <sup>+</sup> ] | <i>kan</i>                                                                                                                                                                                                                                                                                                                     | Tsui <i>et al.</i> , 2011      |

<sup>a</sup>P<sub>Zn</sub> stands for P<sub>*czcD*</sub>, Zn<sup>2+</sup> inducible promoter.

<sup>b</sup>Strains were constructed as described in Materials and Methods.

<sup>c</sup>Antibiotic resistance markers: *cm*, chloramphenicol; *erm*, erythromycin; *kan*, kanamycin; *aad9/spec*, spectinomycin; *str*, streptomycin; *tet*, tetracycline; *amp*, ampicillin.

**Table S2. List of primers used in this study**

| Primer                                                                                                                    | Sequence (5' to 3')                                              | Template <sup>a</sup>                                              | Product amplicon                                                |
|---------------------------------------------------------------------------------------------------------------------------|------------------------------------------------------------------|--------------------------------------------------------------------|-----------------------------------------------------------------|
| <b>For Construction of the Rx1 <math>\Delta</math>ftsA//P<sub>Zn</sub>gfp-ftsA<sup>+</sup> depletion mutant</b>           |                                                                  |                                                                    |                                                                 |
| AKOF1_6297                                                                                                                | TGCCACTGTCAGAAAGCCTA                                             | Rx1                                                                | flanking region left upstream of <i>ftsA</i>                    |
| AKOR2_P <sub>less</sub> - <i>cat</i>                                                                                      | AGTTCATTTGATATGCCTCCTAATCCAAGT<br>TTCGCACTTCGTAT                 |                                                                    |                                                                 |
| AKOF3_P <sub>less</sub> - <i>cat</i>                                                                                      | ATACGAAGTGCGAAACTTGGATTAGGAGG<br>CATATCAAATGAACT                 | pR326                                                              | P <sub>less</sub> <i>cat</i>                                    |
| AKOR4_P <sub>less</sub> - <i>cat</i>                                                                                      | CAATACCACCAGGGAGGTCCAATATTATAA<br>AAGCCAGTCATTAG                 |                                                                    |                                                                 |
| AKOF5_P <sub>less</sub> - <i>cat</i>                                                                                      | CTAATGACTGGCTTTTATAATATTGGACCT<br>CCCTGGTGGTATTG                 | Rx1                                                                | flanking region right downstream of <i>ftsA</i>                 |
| AKOR6_8470                                                                                                                | ACCTCCACCGACACCAATTAC                                            |                                                                    |                                                                 |
| <b>Verification of integration of <math>\Delta</math>ftsA::P<sub>less</sub><i>cat</i> at the <i>ftsA</i> native locus</b> |                                                                  |                                                                    |                                                                 |
| ADF1                                                                                                                      | AACCAAGCCGCCCAAATTTG                                             | Rx1 $\Delta$ ftsA//P <sub>Zn</sub><br><i>gfp-ftsA</i> <sup>c</sup> | upstream of <i>ftsA</i> ,                                       |
| ADR6                                                                                                                      | GCTTTACGACCAACCTCAGG                                             |                                                                    | downstream of <i>ftsA</i>                                       |
| <b>Cloning of <i>gfp</i> fusions in the pJWV25 plasmid</b>                                                                |                                                                  |                                                                    |                                                                 |
| <i>sepF</i> _SpeI <sup>b</sup>                                                                                            | GCGCACTAGTTCTTTAAAAGATAGATTCTGA<br>TAGATTTATAG                   | Rx1                                                                | <i>sepF</i> <sup>+</sup>                                        |
| <i>sepF</i> _NotI <sup>b</sup>                                                                                            | ATAAGAATGCGGCCGCTTATTATCGTACTC<br>TATTCGCTTCATATCAAACC           |                                                                    |                                                                 |
| <i>gpsB</i> _SpeI <sup>b</sup>                                                                                            | GGACTAGTATGGCAAGTATTATTTTTTCAG                                   |                                                                    | <i>gpsB</i> <sup>+</sup>                                        |
| <i>gpsB</i> _NotI <sup>b</sup>                                                                                            | ATTAGCGGCCGCTTAAAATCTGAGTTATC<br>TAAAA                           |                                                                    |                                                                 |
| <b>Verification of integration of <i>gfp</i>-fusions at the ectopic <i>bgaA</i> region</b>                                |                                                                  |                                                                    |                                                                 |
| <i>bga</i> _check_F                                                                                                       | CCACTCGCAACAATCACTTGG                                            | Rx1 P <sub>Zn</sub> <i>gfp</i><br>fusion                           | <i>bgaA</i> region external                                     |
| <i>bga</i> _PF_ext_661                                                                                                    | GCTCATCATGTTGATTGTCA                                             |                                                                    | pJWV25 internal                                                 |
| PR1_4392                                                                                                                  | TGTCAATTTGATAGCGGGAAC                                            |                                                                    |                                                                 |
| PF1_4372                                                                                                                  | GTTGGGAAGTGAATGCAGTA                                             |                                                                    | <i>bgaA</i> region external                                     |
| <i>bga</i> _PR_ext_7834                                                                                                   | AGGACAAGAGTTTTTCTTTGG                                            |                                                                    |                                                                 |
| <i>bga</i> _check_R                                                                                                       | GGGATTGGTACTTATGGCCAATAACC                                       |                                                                    |                                                                 |
| <b>For construction of IU7667 (<i>ftsZ</i>-Myc markerless)</b>                                                            |                                                                  |                                                                    |                                                                 |
| TT165                                                                                                                     | AGTGGTGCCGATATGGTCTTCATCACTGC<br>T                               | IU6962 <sup>c</sup>                                                | 3' <i>ftsZ</i> -Myc                                             |
| TT587                                                                                                                     | GTATTTTCTTTTACATTCATTTACTTAAAGA<br>TCTTCTTCAGAAATAAGTTTTTGTTCACG |                                                                    |                                                                 |
| TT588                                                                                                                     | ACTTATTTCTGAAGAAGATCTTTAAGTAAAT<br>GAATGTAAAAGAAAATACAGAACTTGT   | D39                                                                | downstream of <i>ftsZ</i>                                       |
| TT166                                                                                                                     | TCATTGGGAGAGCCGGTTCCTGTGAAGAA<br>T                               |                                                                    |                                                                 |
| <b>For construction of IU8039 (<math>\Delta</math><i>sepF</i> markerless)</b>                                             |                                                                  |                                                                    |                                                                 |
| P1477                                                                                                                     | ACTACCGTGAGACAGTGAAACCAGCTCAT<br>TC                              | D39                                                                | upstream of <i>sepF</i> <sup>+</sup><br>60 bp of 5' <i>sepF</i> |
| AJP22                                                                                                                     | CACCCTGTTGATCTTCATCTGGTGAATCCT<br>CATCCTCCGTAAAATAATCTAT         |                                                                    |                                                                 |

|                                                                                                                                                     |                                                                   |                                                              |                                                                            |
|-----------------------------------------------------------------------------------------------------------------------------------------------------|-------------------------------------------------------------------|--------------------------------------------------------------|----------------------------------------------------------------------------|
| AJP23                                                                                                                                               | TTTACGGAGGATGAGGATTCACCAGATGA<br>AGATCAACAGGGTGAGTT               | D39                                                          | 3' 60 bp of <i>sepF</i> <sup>+</sup><br>downstream of<br><i>sepF</i>       |
| P1478                                                                                                                                               | GTTCTCCAGCGAAACAGGTATACGACCA<br>A                                 |                                                              |                                                                            |
| <b>For construction of IU8499 (<i>ftsZ-Myc-ylmE</i><sup>+</sup>-<math>\Delta</math><i>sepF</i>::P<sub>c</sub>-[<i>kan-rpsL</i><sup>+</sup>])</b>    |                                                                   |                                                              |                                                                            |
| P1477                                                                                                                                               | ACTACCGTGAGACAGTGAAACCAGCTCAT<br>TC                               | IU7667 <sup>c</sup>                                          | 5' of <i>ftsZ-Myc-ylmE</i> <sup>+</sup> -and 5' 60<br>bp of <i>sepF</i>    |
| P1479                                                                                                                                               | CATTATCCATTAATAAATCAAACGGATCCTA<br>TGAATCCTCATCCTCCGTAAAATAATCTAT |                                                              |                                                                            |
| Kan rpsL forward                                                                                                                                    | TAGGATCCGTTTGATTTTTAATGGATAATG                                    | P <sub>c</sub> -[ <i>kan-rpsL</i> <sup>+</sup> ]<br>cassette | P <sub>c</sub> -[ <i>kan-rpsL</i> <sup>+</sup> ]                           |
| Kan rpsL reverse                                                                                                                                    | GGGCCCTTTTCCTTATGCTTTTTG                                          |                                                              |                                                                            |
| P1480                                                                                                                                               | CAAAGCATAAGGAAAGGGGCCCCAGAT<br>GAAGATCAACAGGGTGAGTT               | D39                                                          | 3' 60 bp of <i>sepF</i> <sup>+</sup><br>downstream                         |
| P1478                                                                                                                                               | GTTCTCCAGCGAAACAGGTATACGACCA<br>A                                 |                                                              |                                                                            |
| <b>For construction of IU8503 (<i>ftsZ-Myc-ylmE</i><sup>+</sup>-<math>\Delta</math><i>sepF</i> markerless)</b>                                      |                                                                   |                                                              |                                                                            |
| P1477                                                                                                                                               | ACTACCGTGAGACAGTGAAACCAGCTCAT<br>TC                               | IU7667 <sup>c</sup>                                          | 3' of <i>ftsZ-Myc-ylmE</i> <sup>+</sup> -and 5' 60<br>bp of <i>sepF</i>    |
| AJP22                                                                                                                                               | CACCCTGTTGATCTTCATCTGGTGAATCCT<br>CATCCTCCGTAAAATAATCTAT          |                                                              |                                                                            |
| AJP23                                                                                                                                               | TTTACGGAGGATGAGGATTCACCAGATGA<br>AGATCAACAGGGTGAGTT               | D39                                                          | 3' 60 bp of <i>sepF</i> <sup>+</sup><br>downstream                         |
| P1478                                                                                                                                               | GTTCTCCAGCGAAACAGGTATACGACCA<br>A                                 |                                                              |                                                                            |
| <b>For construction of IU9767 (P<sub>c</sub>-[<i>kan-rpsL</i><sup>+</sup>]-<i>ftsA</i>)</b>                                                         |                                                                   |                                                              |                                                                            |
| TT780                                                                                                                                               | CGCATTACCAAGGAGCAAATAGAGCTTCT<br>TTGGCAGG                         | D39                                                          | 3' <i>spd_1481</i> + 70<br>bp intergenic<br>region                         |
| TT751                                                                                                                                               | ATTATCCATTAATAAATCAAACGGATCCTAT<br>CTATTCAGAAATTCTATTTTATAAGCTGC  |                                                              |                                                                            |
| Kan rpsL forward                                                                                                                                    | TAGGATCCGTTTGATTTTTAATGGATAATG                                    | P <sub>c</sub> -[ <i>kan-rpsL</i> <sup>+</sup> ]<br>cassette | P <sub>c</sub> -[ <i>kan-rpsL</i> <sup>+</sup> ]                           |
| Kan rpsL reverse                                                                                                                                    | GGGCCCTTTTCCTTATGCTTTTTG                                          |                                                              |                                                                            |
| TT781                                                                                                                                               | CAAAGCATAAGGAAAGGGGCCCGCAGAA<br>AAAATGATTGCAAAGGAAGC              | D39                                                          | 30 bp 3'<br><i>spd_1481</i> ,<br>intergenic (281 bp)<br>and 5' <i>ftsA</i> |
| TT753                                                                                                                                               | GCCTTCCGCTAATTTGCGAGAGGTTTTCAA                                    |                                                              |                                                                            |
| <b>For construction of IU9969 (FLAG-<i>ftsA</i>)</b>                                                                                                |                                                                   |                                                              |                                                                            |
| TT780                                                                                                                                               | CGCATTACCAAGGAGCAAATAGAGCTTCT<br>TTGGCAGG                         | D39                                                          | Upstream of <i>ftsA</i><br>and FLAG                                        |
| TT767                                                                                                                                               | TCTCTAGCTTTATCATCATCCTTTATAAT<br>CCATTACATCGCTTCTCTCTATCTTCCA     |                                                              |                                                                            |
| TT768                                                                                                                                               | ATGGATTATAAAGATGATGATGATAAAGCT<br>AGAGAAGGCTTTTTTACAGGTCTAGATATT  | D39                                                          | FLAG- <i>ftsA</i>                                                          |
| TT753                                                                                                                                               | GCCTTCCGCTAATTTGCGAGAGGTTTTCAA                                    |                                                              |                                                                            |
| <b>For construction of IU12307, IU12310 and IU12326 (<i>bgaA</i>'::<i>tet</i>-P<sub>Zn</sub>-RBS<sub><i>ftsA</i></sub>-<i>ftsA</i><sup>+</sup>)</b> |                                                                   |                                                              |                                                                            |
| TT657                                                                                                                                               | CGCCCCAAGTTCATCACCAATGACATCAA<br>C                                | pJWV25                                                       | <i>bgaA</i> ':: <i>tet</i> -P <sub>Zn</sub>                                |
| AJP32                                                                                                                                               | ACATCGCTTCTCTCTATCTTCCTTGTTAT<br>AATAGATTTATGAACACCTTGTTCAATATC   |                                                              |                                                                            |

|                                                                                                        |                                                                 |                                                             |                                                                                                  |
|--------------------------------------------------------------------------------------------------------|-----------------------------------------------------------------|-------------------------------------------------------------|--------------------------------------------------------------------------------------------------|
| AJP48                                                                                                  | AACAAGGTGTTTCATAAATCTATTATAACAA<br>GGAAGATAGAGAGGAAGCGATGTAATGG | D39                                                         | RBS <sub>ftsA-ftsA<sup>+</sup></sub> (24<br>bp upstream of<br><i>ftsA</i> + <i>ftsA</i> )        |
| AJP49                                                                                                  | CAACTGGTTTATGAGAAAGTAAGTTCTTTT<br>ATTCGTCAAACATGCTTCCGATC       |                                                             |                                                                                                  |
| AJP50                                                                                                  | CGGAAGCATGTTTGACGAATAAAAGAACTT<br>ACTTTCTCATAAACAGTTGC          | D39                                                         | 3' fragment<br>containing <i>bgaA</i> '                                                          |
| CS121                                                                                                  | GCTTTCTTGAGGCAATTCAGTTGGTGC                                     |                                                             |                                                                                                  |
| <b>For construction of IU12323 (<math>\Delta</math><i>ftsA::aad9</i>)</b>                              |                                                                 |                                                             |                                                                                                  |
| AJP43                                                                                                  | CTTTATGGTTGGTACTGGGTCAATC                                       | D39                                                         | 5' flanking region<br>upstream of <i>ftsA</i>                                                    |
| AJP44                                                                                                  | CGTATGTATTCAAATATATCCTCCTCACTA<br>CATCGCTTCCTCTCTATCTTCCAAG     |                                                             |                                                                                                  |
| AJP45                                                                                                  | GGAAGATAGAGAGGAAGCGATGTAGTGAG<br>GAGGATATATTTGAATACATACGAAC     | IU1753 <sup>d</sup>                                         | <i>aad9</i> ORF<br>replaces <i>ftsA</i><br>reading frame with<br>extra 9 bp for<br>primer design |
| AJP46                                                                                                  | CTTGTTGGAAATCCGCCATATGTCGTTCTT<br>ATAATTTTTTAAATCTGTTATTTAA     |                                                             |                                                                                                  |
| AJP47                                                                                                  | ACAGATTAATAAATTATAAGAACGACATA<br>TGCGGATTTCCAACAAGCTT           | D39                                                         | 90 bp of 3' <i>ftsA</i><br>and downstream<br>of <i>ftsA</i>                                      |
| TT462                                                                                                  | CAGATGTTCACTCCTTGACCTGCTGCCTG<br>G                              |                                                             |                                                                                                  |
| <b>For construction of K734 (<math>\Delta</math><i>sepF::P<sub>c</sub>-[kan-rpsL<sup>+</sup>]</i>)</b> |                                                                 |                                                             |                                                                                                  |
| P1477                                                                                                  | ACTACCGTGAGACAGTGAAACCAGCTCAT<br>TC                             | D39                                                         | upstream of <i>sepF</i><br>+ 60 bp of <i>sepF</i>                                                |
| P1479                                                                                                  | CATTATCCATTAAAAATCAAACGGATCCTA<br>TGAATCCTCATCCTCCGTAATAATCTAT  |                                                             |                                                                                                  |
| Kan rpsL forward                                                                                       | TAGGATCCGTTTGATTTTTAATGGATAATG                                  | P <sub>c</sub> -[ <i>kan-rpsL<sup>+</sup></i> ]<br>cassette | P <sub>c</sub> -[ <i>kan-rpsL<sup>+</sup></i> ]                                                  |
| Kan rpsL reverse                                                                                       | GGGCCCTTTCCTTATGCTTTTG                                          |                                                             |                                                                                                  |
| P1480                                                                                                  | CAAAGCATAAGGAAAGGGGCCCCAGAT<br>GAAGATCAACAGGGTGAGTT             | D39                                                         | 3' 60 bp of <i>sepF<sup>+</sup></i><br>downstream                                                |
| P1478                                                                                                  | GTTCTCCAGCGAAACAGGTATACGACCAA                                   |                                                             |                                                                                                  |

<sup>a</sup>Genomic DNA of indicated *S. pneumoniae* strains was used as templates for PCR reactions except for P<sub>less-cat</sub> and P<sub>c</sub>-[*kan-rpsL<sup>+</sup>*] (Janus) cassette.

<sup>b</sup>The underlined text in the primer sequence column indicates restriction sites.

<sup>c</sup>Genotype of strain described in Table S1.

<sup>d</sup>Genotype of IU1753 is R6  $\Delta$ *mreD*→*aad9* (Land & Winkler, 2011).

## References Table S1 and Table S2

1. **Beilharz K, Nováková L, Fadda D, Branny P, Massidda O, Veening JW.** 2012. Control of cell division in *Streptococcus pneumoniae* by the conserved Ser/Thr protein kinase StkP. *Proc Natl Acad Sci USA* **109**:E905–913.
2. **Eberhardt A, Wu LJ, Errington J, Vollmer W, Veening JW.** 2009. Cellular localization of choline-utilization proteins in *Streptococcus pneumoniae* using novel fluorescent reporter systems. *Mol Microbiol* **74**:395–408.
3. **Fadda D, Pischedda C, Caldara F, Whalen MB, Anderluzzi D, Domenici E, Massidda O.** 2003. Characterization of *divIVA* and other genes located in the chromosomal region downstream of the *dcw* cluster in *Streptococcus pneumoniae*. *J Bacteriol* **185**:6209–6214.
4. **Hanahan D.** 1983 Studies on transformation of *Escherichia coli* with plasmids. *J Mol Biol.* **166**:557–580.
5. **Lanie JA, Ng WL, Kazmierczak KM, Andrzejewski TM, Davidsen TM, Wayne KJ, Tettelin H, Glass JI, Winkler ME.** 2007 Genome sequence of Avery's virulent serotype 2 strain D39 of *Streptococcus pneumoniae* and comparison with that of unencapsulated laboratory strain R6. *J Bacteriol* **189**:38–51.
6. **Land AD, Tsui H-CT, Kocaoglu O, Vella SA, Shaw SL, Keen SK, Sham LT, Carlson EE, Winkler ME.** 2013. Requirement of essential Pbp2x and GpsB for septal ring closure in *Streptococcus pneumoniae* D39. *Mol Microbiol* **90**:939–955.
7. **Land AD, Winkler ME.** 2011. The requirement for pneumococcal MreC and MreD is relieved by inactivation of the gene encoding PBP1a. *J Bacteriol* **193**:4166–4179.
8. **Ravin AW.** 1959. Reciprocal capsular transformations of pneumococci. *J Bacteriol* **77**:296–309.
9. **Rued BE, Zheng JJ, Mura A, Tsui HCT, Boersma MJ, Mazny JL, Corona F, Perez AJ, Fadda D, Doubravová L, Buriánková K, Branny P, Massidda O, Winkler ME.** Suppression and synthetic-lethal genetic relationships of  $\Delta$ *gpsB* Mutations indicate that GpsB mediates protein phosphorylation and penicillin-binding protein interactions in *Streptococcus pneumoniae* D39. Manuscript submitted.
10. **Sham LT, Barendt SM, Kopecky KE, Winkler ME.** 2011. Essential PcsB putative peptidoglycan hydrolase interacts with the essential FtsXSpn cell division protein in *Streptococcus pneumoniae* D39. *Proc Natl Acad Sci USA* **108**:E1061–1069.
11. **Tsui HC, Keen SK, Sham LT, Wayne KJ, Winkler ME.** 2011. Dynamic distribution of the SecA and SecY translocase subunits and septal localization of the HtrA surface chaperone/protease during *Streptococcus pneumoniae* D39 cell division. *mBio* **2**:e00202-11.
12. **Tsui HC, Zheng JJ, Magallon AN, Ryan JD, Yunck R, Rued BE, Bernhardt TG, Winkler ME.** 2016. Suppression of a deletion mutation in the gene encoding essential PBP2b reveals a new lytic transglycosylase involved in peripheral peptidoglycan synthesis in *Streptococcus pneumoniae* D39. *Mol Microbiol* **100**:1039–1065.



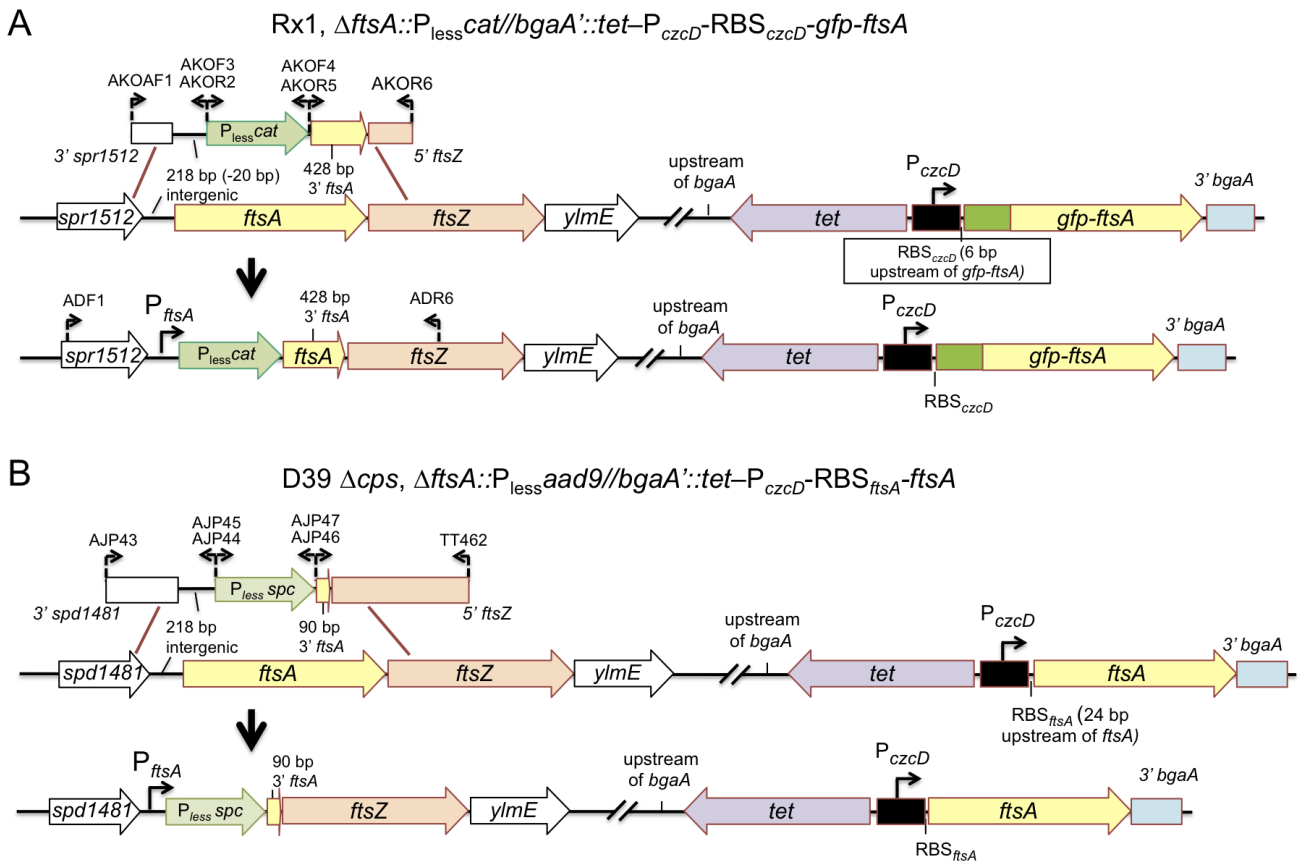

**Fig. S1. Construction of (A) Rx1  $\Delta ftsA::P_{less}cat//bgaA':tet-P_{czcD}-RBS_{czcD}-gfp-ftsA$  and (B) D39  $\Delta cps \Delta ftsA::P_{less}aad9//bgaA':tet-P_{czcD}-RBS_{ftsA}-ftsA$ .** Amplicons containing promoterless *cat* or *spc* marker replacement of 5' *ftsA* and flanking regions were transformed into the merodiploid Rx1 strain containing  $P_{czcD}-RBS_{czcD}-gfp-ftsA$  or D39  $\Delta cps$  strain containing  $tet-P_{czcD}-RBS_{ftsA}-ftsA$  in the ectopic *bgaA* site. Primers used for construction of the  $\Delta ftsA$  alleles are shown in the first line.  $P_{czcD}$  is a Zn-dependent promoter described in *Materials and Methods*.  $P_{ftsA}$  is the native promoter for the *ftsA-ftsZ-ylmE-sepF-ylmG-ylmH-divIVA* operon, although the exact location of this promoter has not been determined.

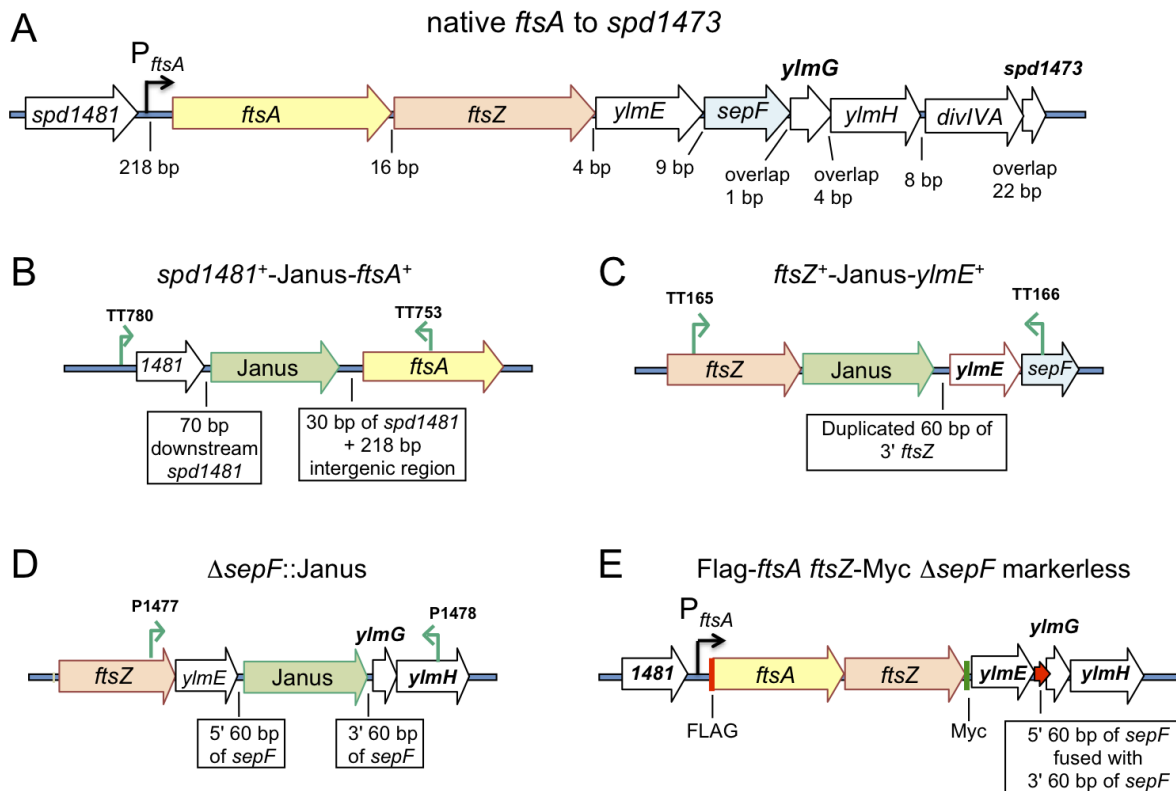

**Fig. S2. Construction of D39 FLAG-*ftsA* *ftsZ*-Myc  $\Delta$ *sepF* markerless strain.** (A) The *ftsA-ftsZ-ylmE-sepF-ylmG-ylmH-divIVA-spd1473* operon in *S. pneumoniae* D39 strain as predicted by the DOOR 2.0 operon database (<http://csbl.bmb.uga.edu/DOOR/>). The exact location of the promoter for the operon ( $P_{ftsA}$ ) has not been determined. (B-D) Intermediate constructs *spd1481*<sup>+</sup>-Janus-*ftsA*<sup>+</sup>: (B), *ftsZ*<sup>+</sup>-Janus-*ylmE*<sup>+</sup> (C), and  $\Delta$ *sepF*::Janus (D) containing the Janus cassette ( $P_c$ -[*kan-rpsL*<sup>+</sup>]) to create markerless FLAG-*ftsA*, *ftsZ*-Myc or  $\Delta$ *sepF* markerless alleles in native chromosomal loci (see Supporting Information Table S1). Outside primers (green arrows) are labeled on each figure and fusion primers used for the generation of amplicons are listed in Supporting Information Table S2. (E) Final FLAG-*ftsA* *ftsZ*-Myc  $\Delta$ *sepF* markerless construct. All native intergenic sequences are retained in this construct.

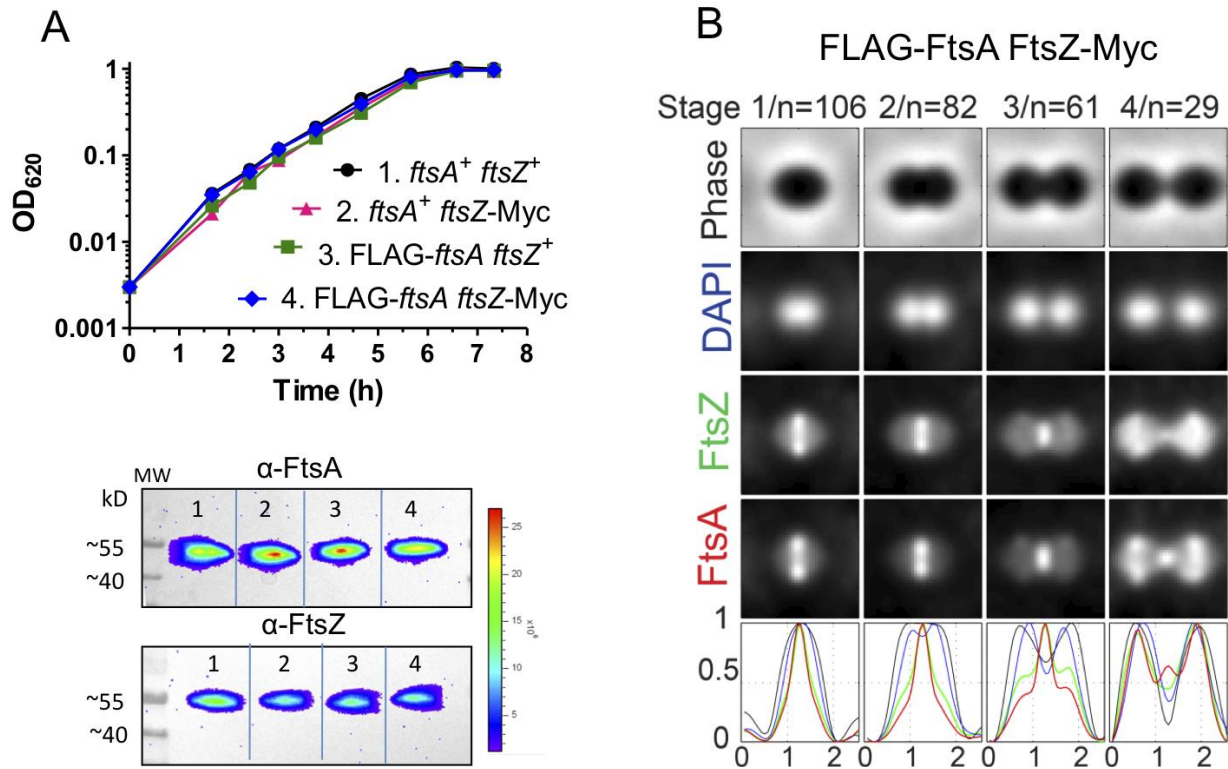

**Fig. S3. Comparison of the D39  $\Delta cps$  FLAG-*ftsA* *ftsZ*-Myc strain with the wild-type *ftsA*<sup>+</sup> *ftsZ*<sup>+</sup> strain and colocalization of FtsZ and FtsA.** (A) Growth curves (top) and Western blotting signals (bottom) using antibodies against FtsA or FtsZ of (1) D39 WT *ftsA*<sup>+</sup> *ftsZ*<sup>+</sup> strain IU1945, (2) *ftsA*<sup>+</sup> *ftsZ*-Myc strain IU7667, (3) FLAG-*ftsA* *ftsZ*<sup>+</sup> strain IU9969 and (4) FLAG-*ftsA* *ftsZ*-Myc strain IU10304. (B) Averaged images and fluorescence intensity traces of 2D IFM images obtained with FLAG-*ftsA* *ftsZ*-Myc strain IU10304. Cells were binned into division stages 1–4, and images of the indicated number of cells (n) from two experiments were averaged and quantified using the graphical user interface program (GUI) described in Materials and Methods. Row 1, cell shapes from phase-contrast images; row 2, DAPI (nucleoid staining) fluorescent signal; row 3, FtsZ-Myc fluorescent signal; row 4, FLAG-FtsA fluorescent signal and row 5, normalized average fluorescence intensity distributions along the horizontal cell axis for each channel (black, phase; blue, DAPI; green, FtsZ; red, FtsA).

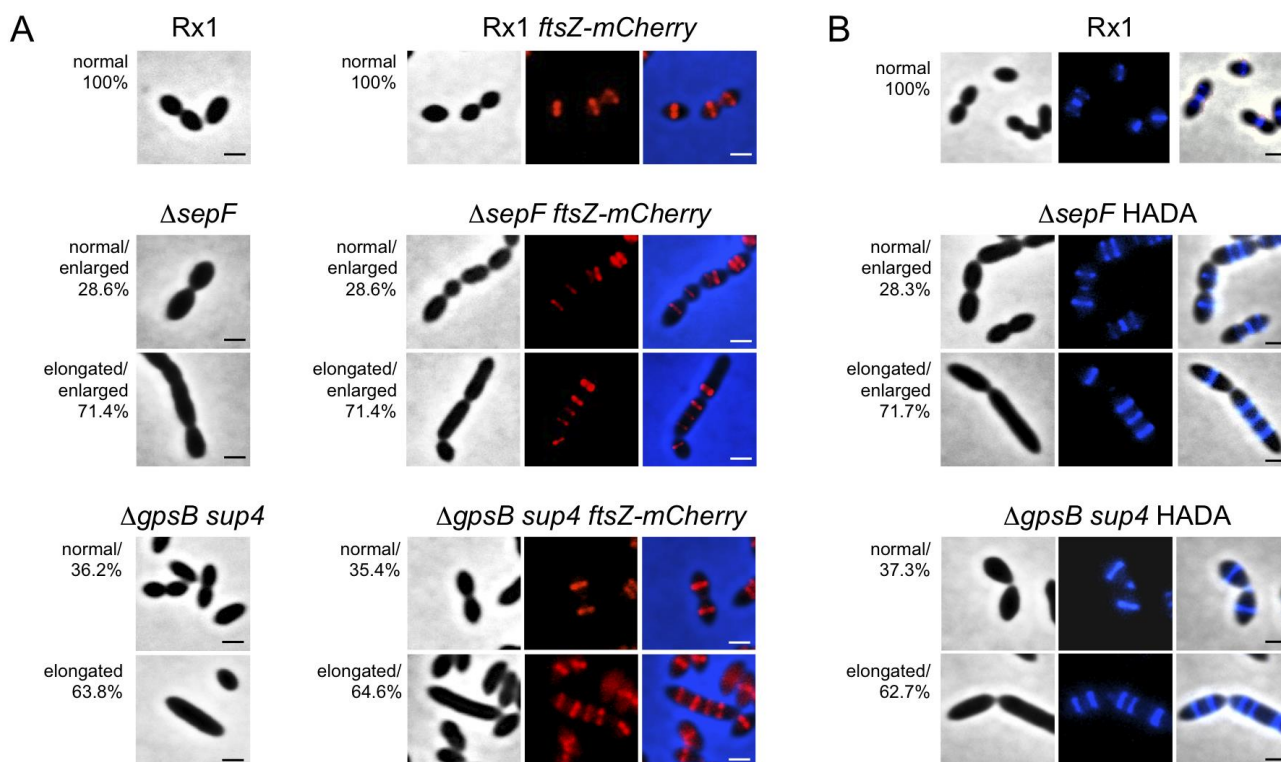

**Fig. S4. Localization of FtsZ and PG synthesis in cells lacking SepF and GpsB.** Cells were grown in TSB (or C+Y) medium at 28°C (or 37°C) to mid-exponential phase (0.3 OD). Fluorescence microscopy and HADA staining were performed as described in Materials and Methods. A minimum of 100 cells were counted and classified and the percentage (%) is indicated beside each frame. (A) Localization of FtsZ in Rx1 *ftsZ-mCherry*, Rx1  $\Delta sepF$  *ftsZ-mCherry* and Rx1  $\Delta gpsB sup4$  *ftsZ-mCherry*. Upper panels, Rx1 and Rx1 *ftsZ-mCherry*; Middle panels, Rx1  $\Delta sepF$  and Rx1  $\Delta sepF$  *ftsZ-mCherry*; Lower panels, Rx1  $\Delta gpsB sup4$  and Rx1  $\Delta gpsB sup4$  *ftsZ-mCherry*. The frames shown, from left to right, are: phase-contrast, FtsZ-mCherry fluorescence and phase-contrast/FtsZ-mCherry fluorescence overlay. Size bar, 1  $\mu$ m. (B) Localization of PG synthesis in Rx1, Rx1  $\Delta sepF$  and Rx1  $\Delta gpsB sup4$ . Upper panels, Rx1; Middle panels, Rx1  $\Delta sepF$ ; Lower panels, Rx1  $\Delta gpsB sup4$ . The frames shown, from left to right, are: phase-contrast, HADA labelling fluorescence and phase-contrast/HADA labelling fluorescence overlay. Size bar, 1  $\mu$ m.

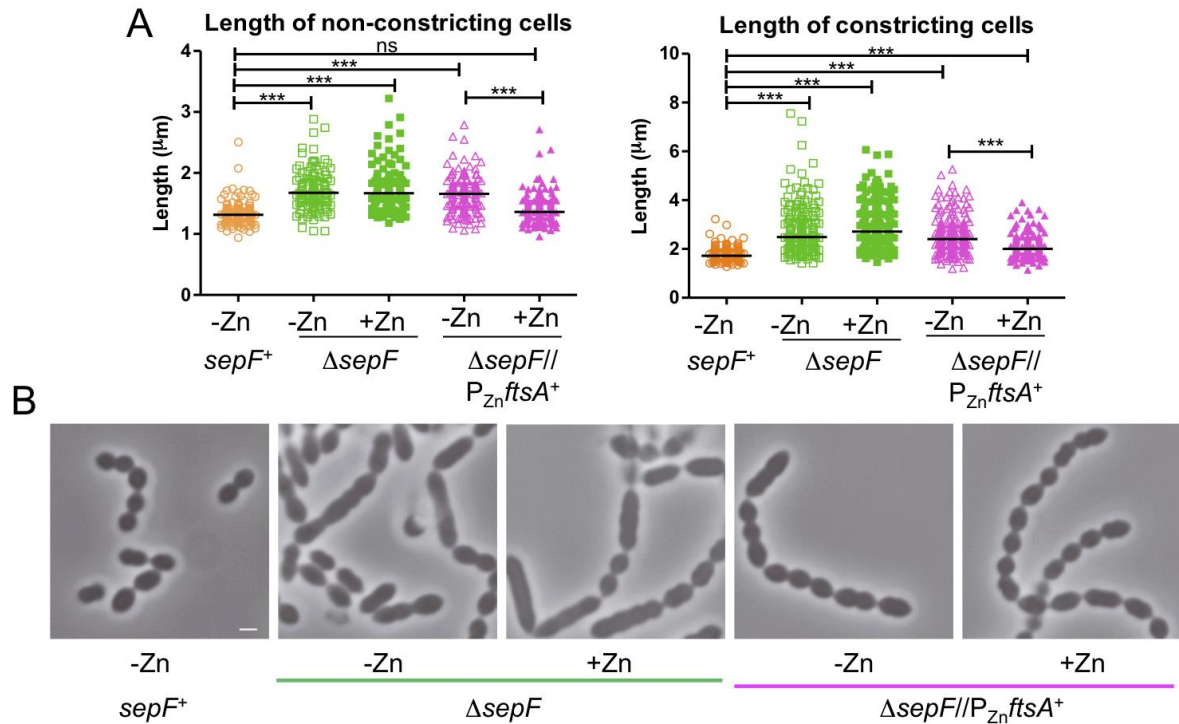

**Fig. S5. Overproduction of FtsA partially reverses cell-length defects in  $\Delta sepF$  mutants of *S. pneumoniae* D39.** Exponentially growing strains of IU1824 (*sepF*<sup>+</sup>; wild-type parent strain), IU8039 ( $\Delta sepF$ ), and IU12326 ( $\Delta sepF//P_{Zn}ftsA$ <sup>+</sup>) were diluted into BHI broth (starting OD<sub>620</sub> ~ 0.005) supplemented with no zinc/manganese (-Zn) or 0.4 mM ZnCl<sub>2</sub> and 0.04 mM MnSO<sub>4</sub> (+Zn) and grown at 37°C for 3 h prior to fixing with 4% paraformaldehyde for direct imaging via phase-contrast microscopy. (A) Scatter plot analysis of cell lengths in non-constricting cells (left graph) or constricting cells (right graph) with the median shown as the black bar. Over 100 cells from two independent experiments were analyzed per strain in each experiment. Open shapes indicate the absence of Zinc inducer (-Zn) while closed shapes indicate the presence of Zinc inducer (+Zn). The following symbols indicate the respective strain: orange circles are IU1824, green squares are IU8039, magenta triangles are IU12326. P values were obtained by one-way ANOVA analysis (GraphPad Prism, nonparametric Kruskal-Wallis test). ( $P < 0.001$  indicated by \*\*\*). (B) Phase-contrast representative images of strains listed in A. Size bar, 1 µm.
